# Supplementary material for: Medical Cost Trajectories and Onsets of Cancer and NonCancer Diseases in US Elderly Population
Source: PubMed Central journal article supplement (PMC3115464; doi:10.1155/2011/857892), 2011-06-01

Cost of initial comorbidity

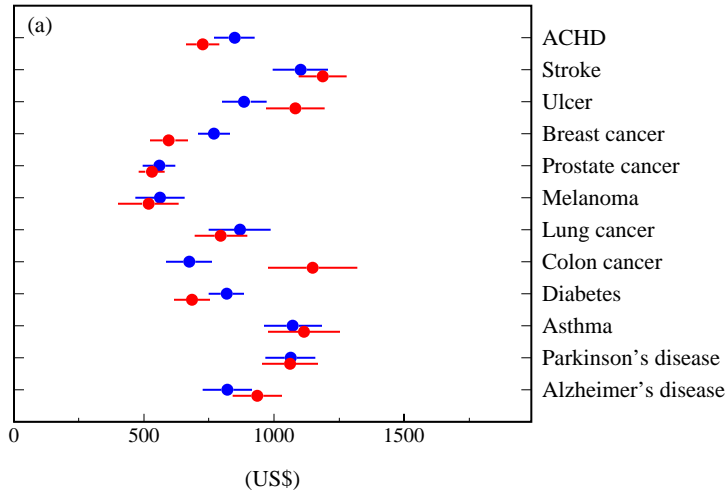

Cost of onset

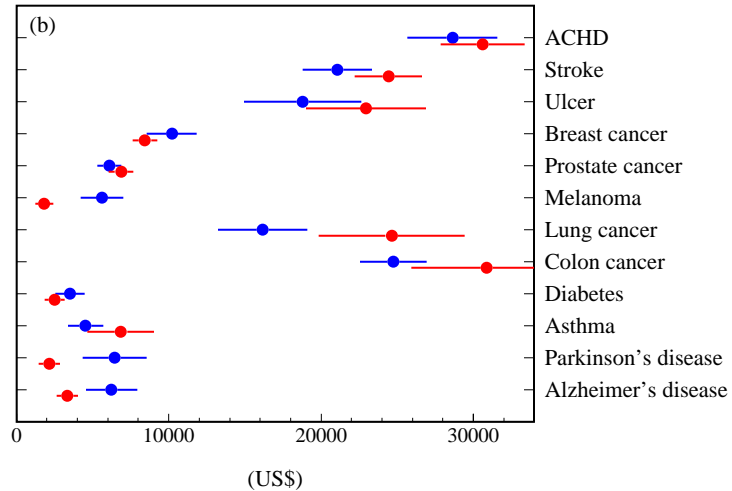

Population recovery rate

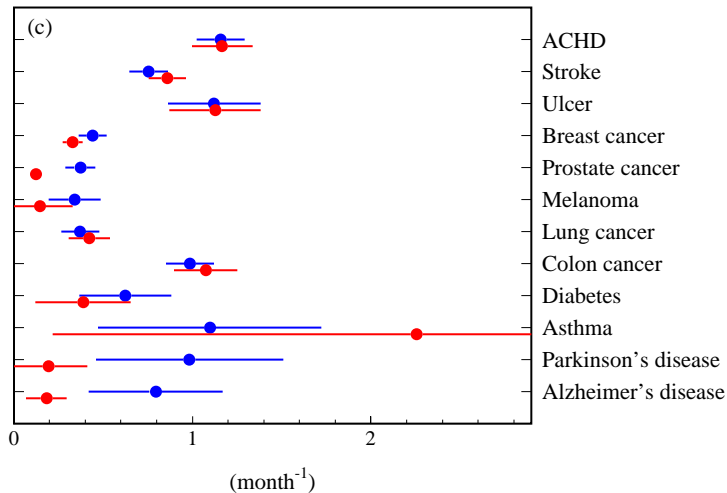

Cost of acquired comorbidity

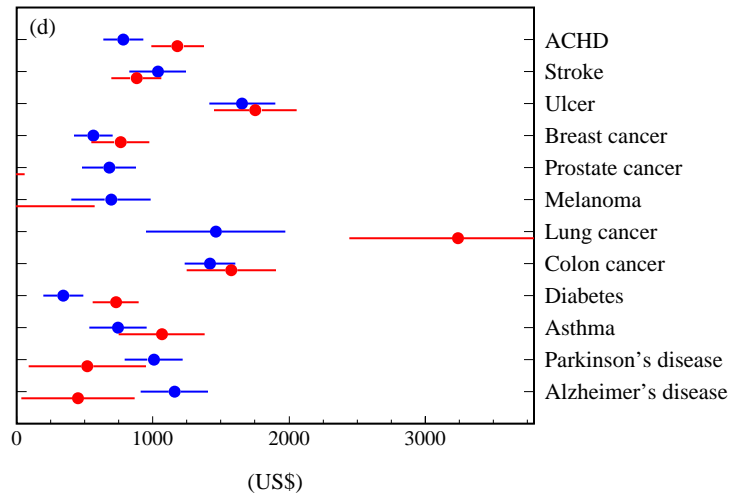

Supplement: 857892.f1.pdf [file 857892.f1.pdf]
