# Supplementary material for: Medical Cost Trajectories and Onsets of Cancer and NonCancer Diseases in US Elderly Population
Source: PubMed Central journal article supplement (PMC3115464; doi:10.1155/2011/857892), 2011-06-01
Supplement: 857892.f2.pdf [file 857892.f2.pdf]

### Disease Burden Rate

### Acquired Comorbidity

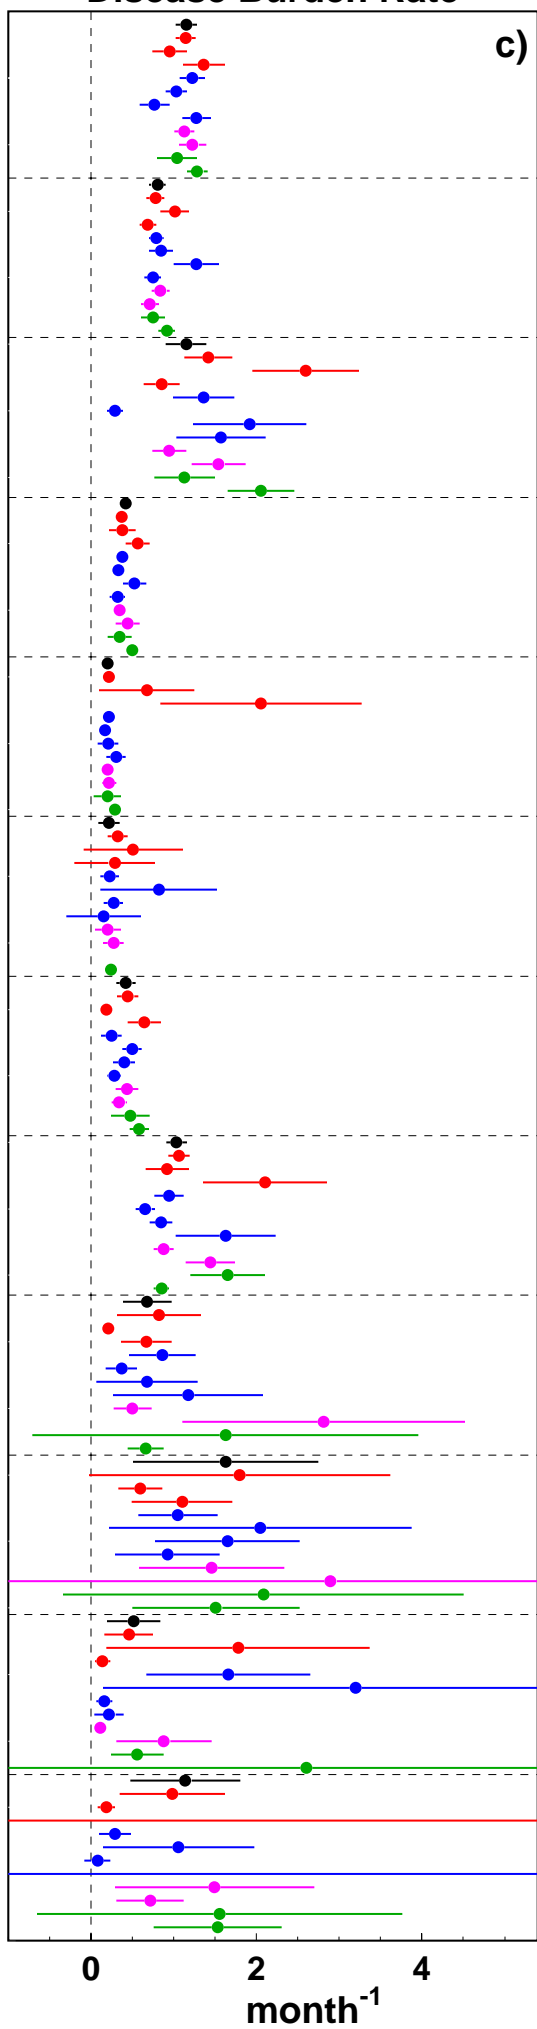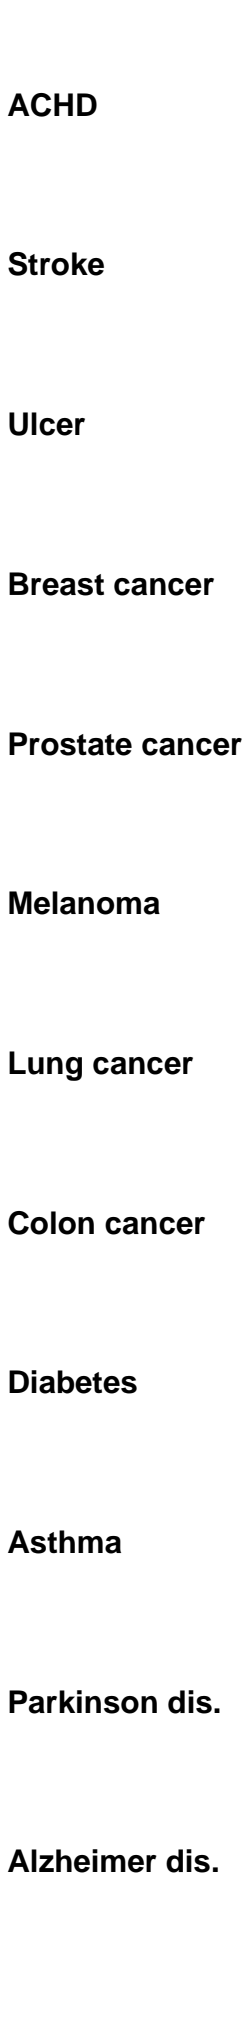

ACHD  
Stroke  
Ulcer  
Breast cancer  
Prostate cancer  
Melanoma  
Lung cancer  
Colon cancer  
Diabetes  
Asthma  
Parkinson dis.  
Alzheimer dis.
