# Supplementary material for: Medical Cost Trajectories and Onsets of Cancer and NonCancer Diseases in US Elderly Population
Source: Hindawi journal article supplement (doi:10.1155/2011/857892), 2011-01-01

Cost of initial comorbidity

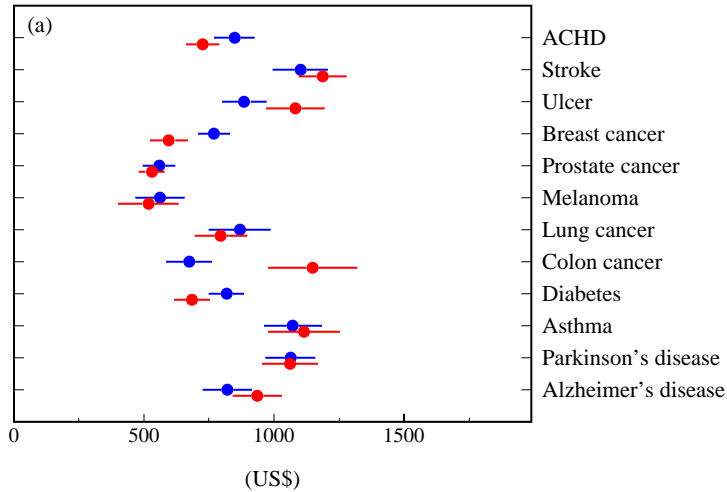

Cost of onset

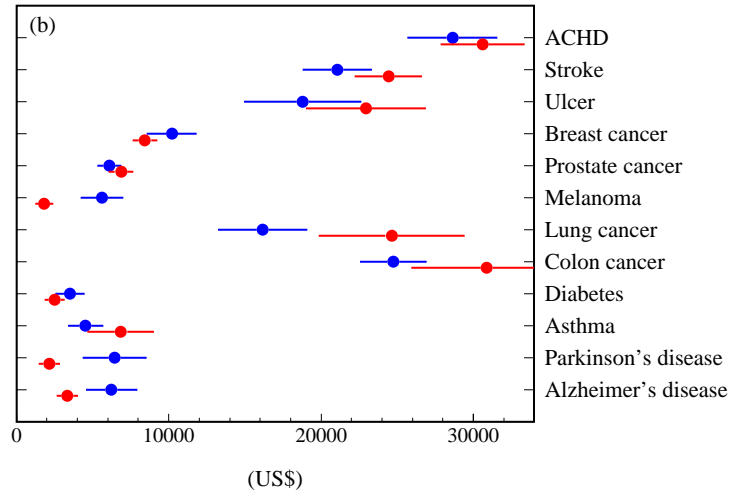

Population recovery rate

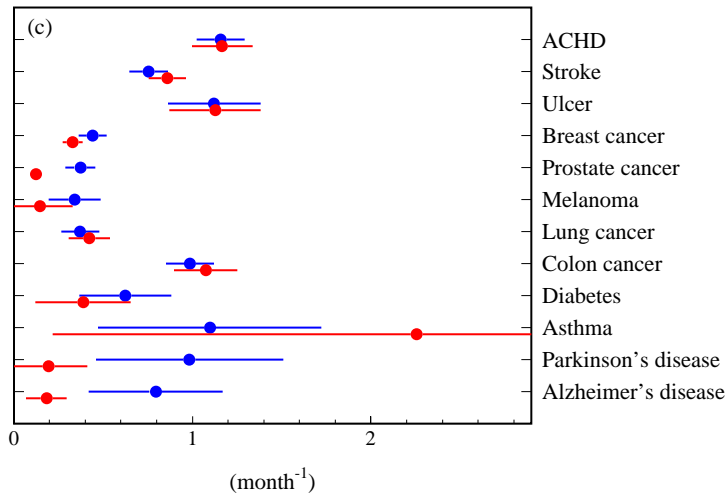

Cost of acquired comorbidity

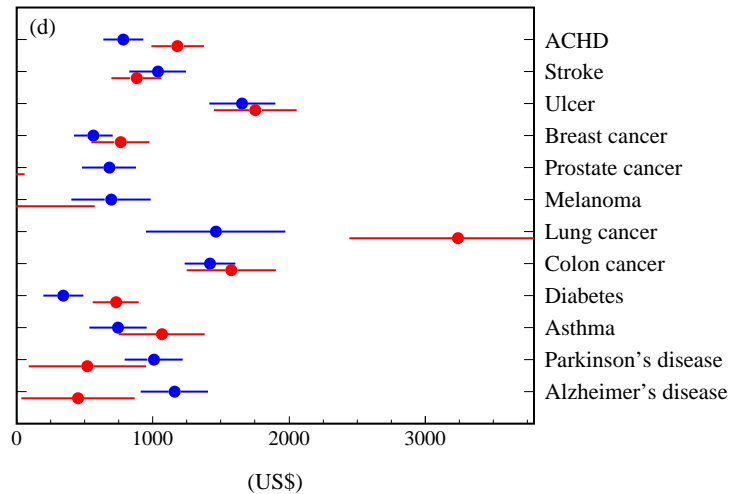

Supplement: f3 [file 857892.f3.pdf]
